# Supplementary material for: Histone Demethylases Coordinate the Antagonistic Interaction Between Abscisic Acid and Brassinosteroid Signaling in Arabidopsis
Source: Front Plant Sci. 2020 Nov 25;11:596835. doi: 10.3389/fpls.2020.596835 (PMC7724051; doi:10.3389/fpls.2020.596835)
Supplement: Supplementary Table 4 — 12 candidates expression change under ABA-treated time courses. [file Table_4.XLSX]

## Sheet: Sheet1
Supplemental Table 4. 12 candidates expression change under ABA-treated time courses
AGI code	Gene name	WT vs jmj30 jmj32	1h	4h	8h	12h	24h	36h	60h
AT5G56370	AT5G56370	-1.22	-0.403536	0.0660559	0.366284	-0.300614	-0.23142	-0.378379	0.103518
AT5G01250	AT5G01250	-3.75	0.358891	1.1688	0.896277	0.92821	1.30622	0.65391	0.587612
AT5G40450	RBB1	-0.83	-0.0794847	-0.473312	-1.51826	-0.866099	-0.846566	-0.919591	-0.902924
AT5G44610	PCAP2	-0.43	0.0864011	0.715788	0.392834	0.168646	0.336046	0.310923	0.154858
AT1G29418	AT1G29418	0.39	-0.142617	-0.61668	-0.220832	0.0265431	-0.0182309	0.197463	-0.111962
AT4G20260	PCAP1	-0.43	0.293811	0.258822	-0.0782819	-0.178617	-0.223189	-0.18647	-0.194783
AT4G12520	AT4G12520	-0.448032	0.391013	0.458862	0.0700739	0.140013	0.203049	0.164737	0.60409
AT4G12510	AT4G12510	-0.86	0.502242	0.268182	0.12047	0.0909391	0.0975623	-0.103968	0.47825
AT1G13430	ST4C	-1.15	0.0913274	-0.121781	-0.811497	-0.633446	0.000965791	-0.0236683	0.509092
AT1G53490	HEI10	-3.10386	0.0338537	-0.227284	0.463604	0.310826	-0.036561	0.469297	0.334358
AT1G52905	AT1G52905	0.67	-0.185436	0.0546849	0.369245	0.30449	0.236733	0.2718	0.452691
AT3G01345	AT3G01345	-6.03306	0	0	0	0	0	0	0
